# Supplementary material for: Bento: a toolkit for subcellular analysis of spatial transcriptomics data
Source: PubMed Central journal article supplement (PMC11289963; doi:10.1186/s13059-024-03217-7), 2024-04-02
Supplement: 13059_2024_3217_MOESM1_ESM.pdf [file 13059_2024_3217_MOESM1_ESM.pdf]

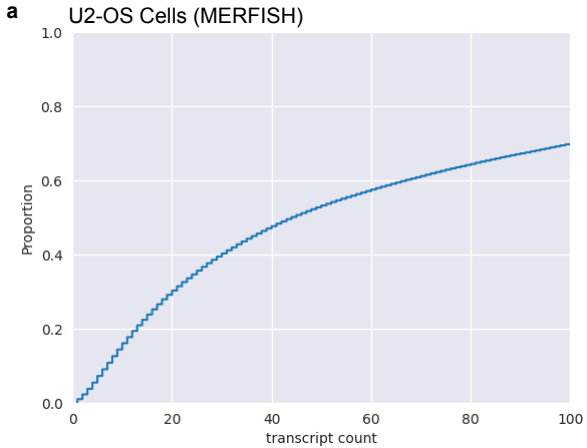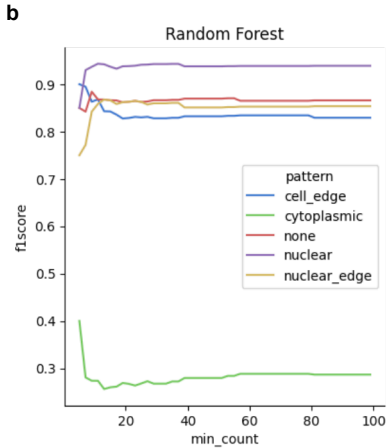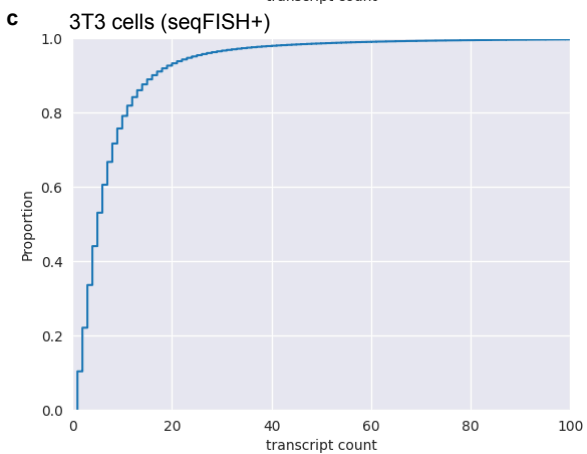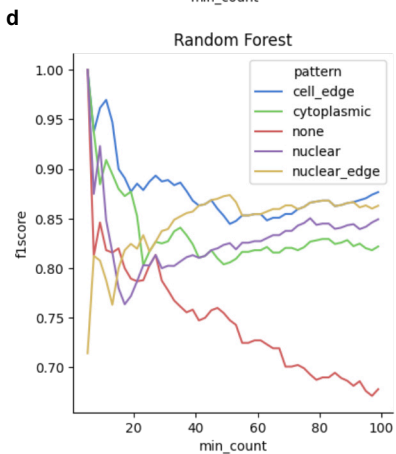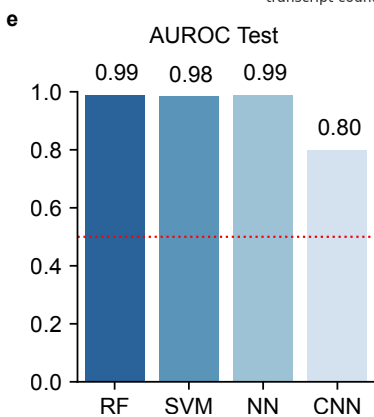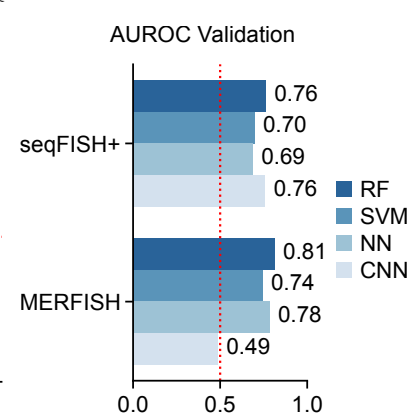

**Fig S1. RNAforest performance evaluation.** **A)** Cumulative distribution of sample molecule copy number in U2-OS cells MERFISH dataset. **B)** Validation F1-score of each binary classifier in RNAforest as a function of sample molecule copy number for MERFISH dataset. **C)** Cumulative distribution of sample molecule copy number in 3T3 cells seqFISH+ dataset. **D)** Validation F1-score of each binary classifier in RNAforest as a function of sample molecule copy number for seqFISH+ dataset. **E)** Benchmarking performance of the 4 base models (RF - random forest, SVM - support vector machine, NN - fully connected neural network, CNN - convolutional neural network), showing AUROC in test and validation data.

**a**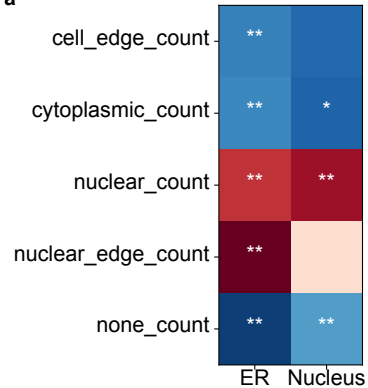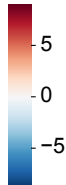

\* $p < 0.05$   
\*\* $p < 0.005$   
(fdr corrected)

**b**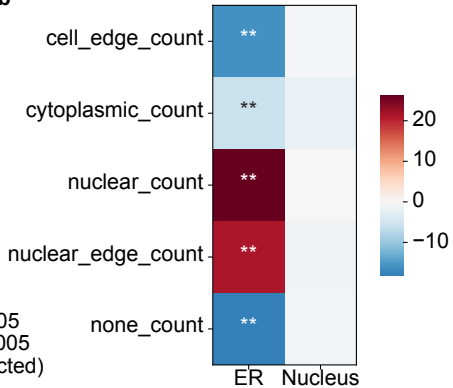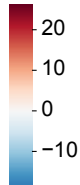

**Fig S2. Enrichment of compartment-specific expression for RNAforest gene pattern frequencies.** Compartment-specific enrichment of endoplasmic reticulum (ER) and nucleus gene expression – from Xia et al 2019[46] – relative to RNAforest gene pattern frequencies in the **A)** MERFISH dataset and **B)** seqFISH+ dataset.

leiden

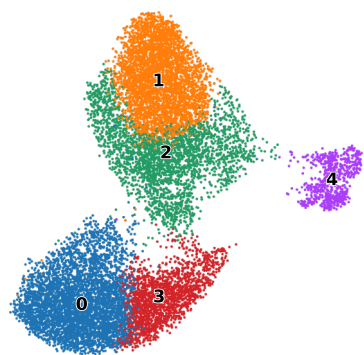

batch

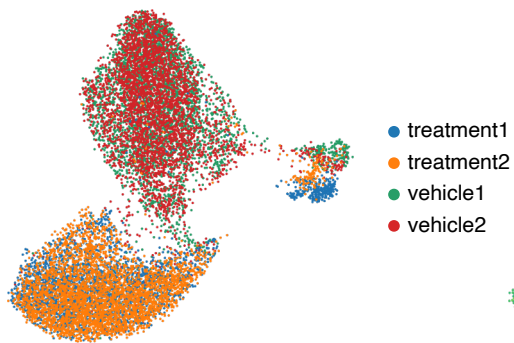

SLC8A1

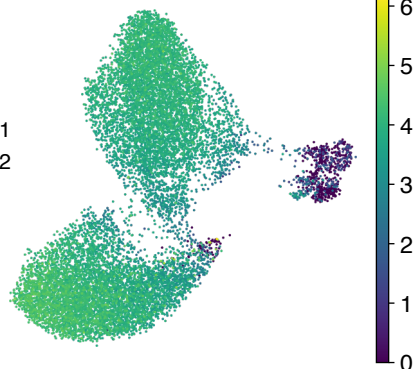

B

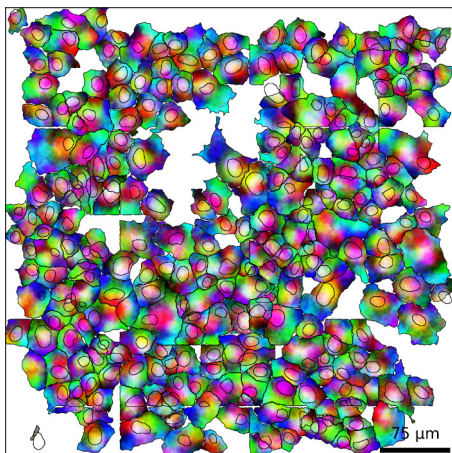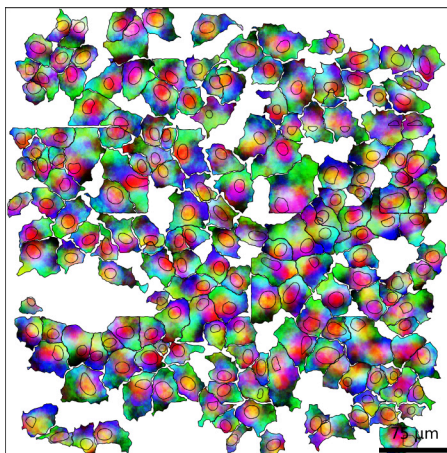

Organelle enrichment score

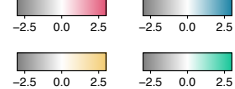

C

Nucleus

ERM

ER Lumen

Cytosol

vehicle

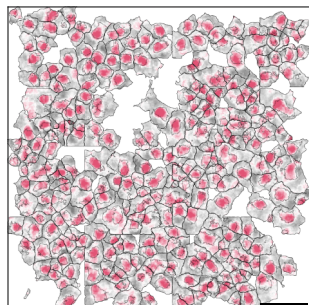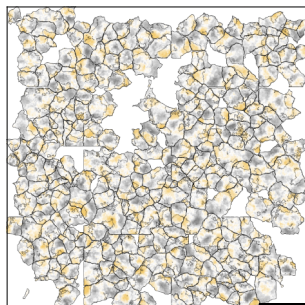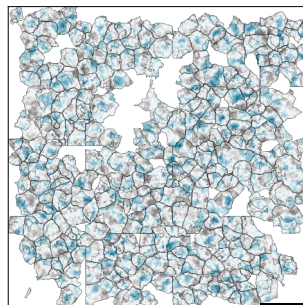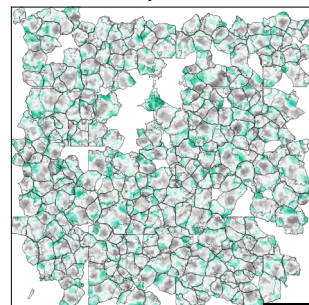

treatment

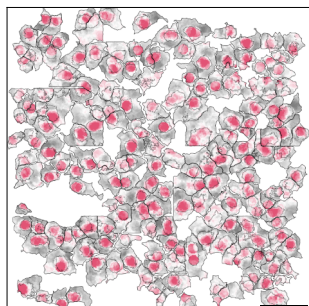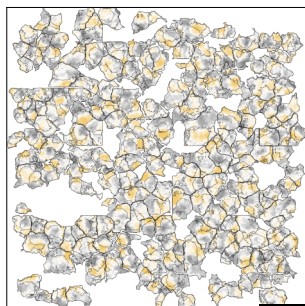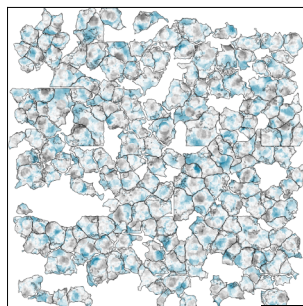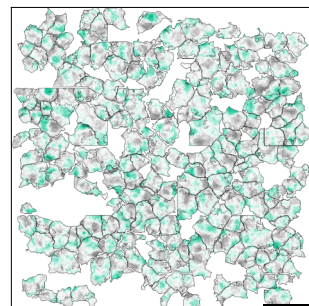

**Fig S3. Filtering and RNAflux analysis of DOX treated cardiomyocytes. A)** Left: UMAP of all 4 cardiomyocyte samples. Leiden Clustering identifies 5 clusters, separating low expression SLC8A1 into cluster 4.. Center: Cells are colored to denote different samples. Right: Cells are colored by log scaled SLC8A1 RNA expression. **B)** Representative crop of vehicle (left) and treatment (right) samples, colored by the first 3 principal components of its RNAflux embedding. **C)** Relative enrichment of transcripts enriched for location-specific expression in vehicle (top) and treatment (bottom) samples. Red, yellow, blue and green enrichment correspond to nuclear, ER membrane, ER lumen, and cytosol genesets respectively.

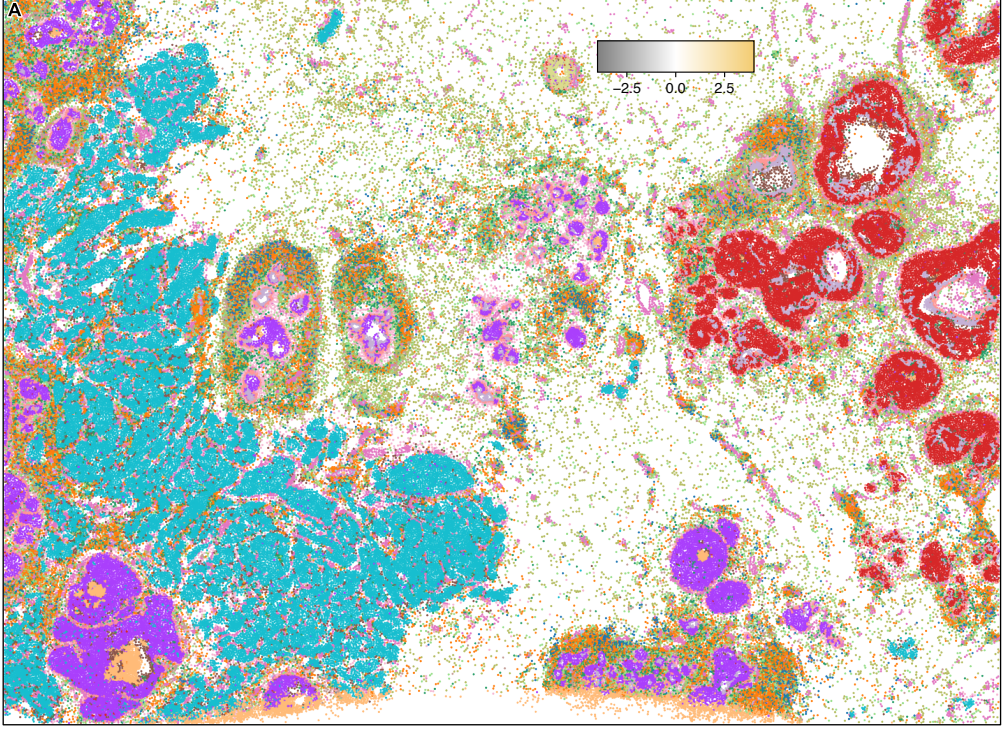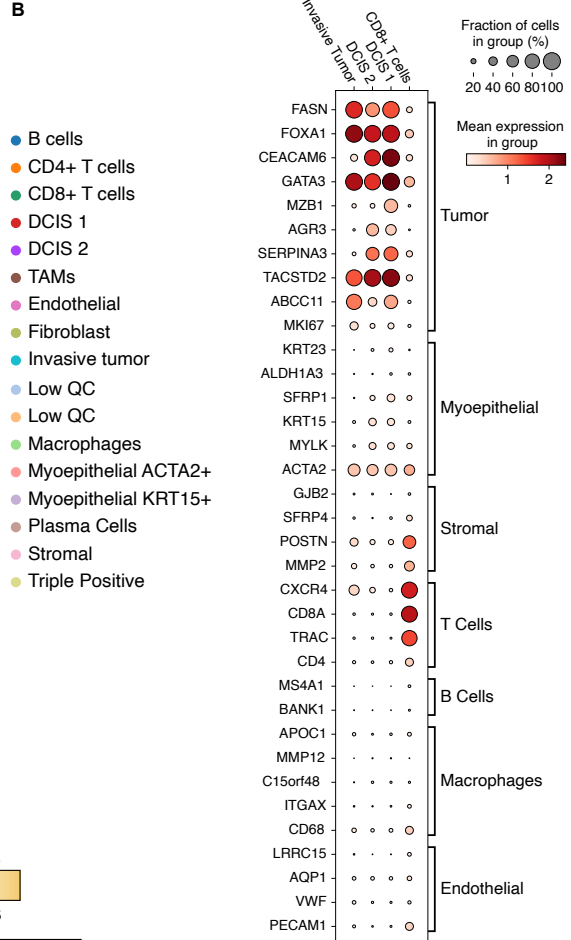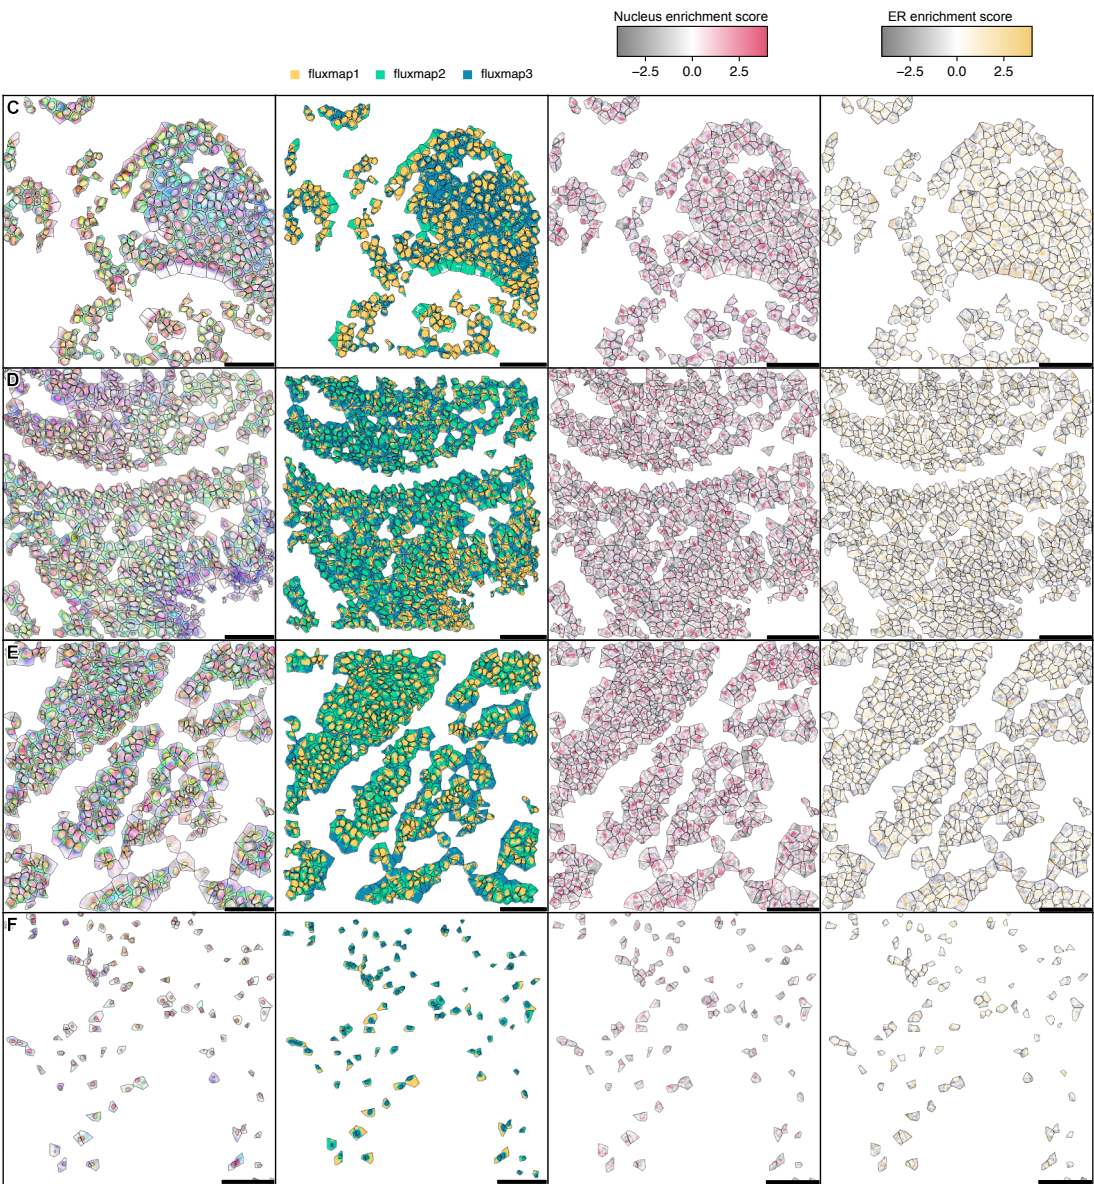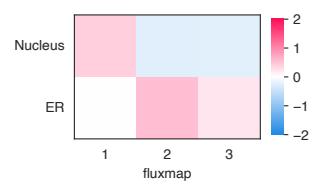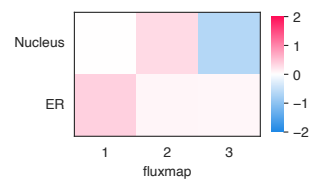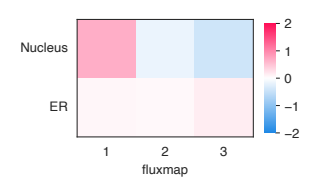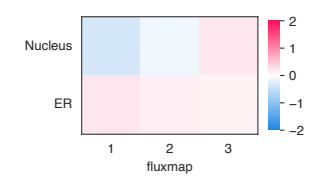

**Fig S4. RNAflux analysis of breast cancer tissue Xenium dataset.** **A)** Cells are colored by cell type identity. **B)** Expression of top marker genes for each cell type. **C) Left:** Visualization of RNAflux results in order of top to bottom: DCIS 1, DCIS 2, invasive tumor, CD8+ T cells. First column presents the RNAflux results by coloring local compositions by their principal components 1-3 weights. Second column shows the fluxmap segmentations with three clusters. Third column shows the enrichment score of nuclear genes in each local composition. The fourth column similarly shows the enrichment scores of endoplasmic reticulum genes in each local composition. **Right:** Summary heatmap of nuclear and ER gene enrichment in the three fluxmaps for each tissue region.



Table S1

|     | Categories        | Features                                                                                                                                                                                                                                                                           |
|-----|-------------------|------------------------------------------------------------------------------------------------------------------------------------------------------------------------------------------------------------------------------------------------------------------------------------|
| 1.  | <b>Distance</b>   | Cell inner proximity: The average distance between all points within the cell to the cell boundary normalized by cell radius. Values closer to 0 denote farther from the cell boundary, values closer to 1 denote closer to the cell boundary.                                     |
| 2.  | <b>Distance</b>   | Nucleus inner proximity: The average distance between all points within the nucleus to the nucleus boundary normalized by cell radius. Values closer to 0 denote farther from the nucleus boundary, values closer to 1 denote closer to the nucleus boundary.                      |
| 3.  | <b>Distance</b>   | Nucleus outer proximity: The average distance between all points within the cell and outside the nucleus to the nucleus boundary normalized by cell radius. Values closer to 0 denote farther from the nucleus boundary, values closer to 1 denote closer to the nucleus boundary. |
| 4.  | <b>Symmetry</b>   | Cell inner asymmetry: The offset between the centroid of all points within the cell to the centroid of the cell boundary, normalized by cell radius. Values closer to 0 denote symmetry, values closer to 1 denote asymmetry.                                                      |
| 5.  | <b>Symmetry</b>   | Nucleus inner asymmetry: The offset between the centroid of all points within the nucleus to the centroid of the nucleus boundary, normalized by cell radius. Values closer to 0 denote symmetry, values closer to 1 denote asymmetry.                                             |
| 6.  | <b>Symmetry</b>   | Nucleus outer asymmetry: The offset between the centroid of all points within the cell and outside the nucleus to the centroid of the nucleus boundary, normalized by cell radius. Values closer to 0 denote symmetry, values closer to 1 denote asymmetry.                        |
| 7.  | <b>Dispersion</b> | Point dispersion: The second moment of all points in a cell relative to the centroid of the total RNA signal. This value is normalized by the second moment of a uniform distribution within the cell boundary.                                                                    |
| 8.  | <b>Dispersion</b> | Nucleus dispersion: The second moment of all points in a cell relative to the centroid of the nucleus boundary. This value is normalized by the second moment of a uniform distribution within the cell boundary.                                                                  |
| 9.  | <b>Density</b>    | *L-function max: The max value of the L-function evaluated at $r=[1,d]$ , where d is half the cell's maximum diameter.                                                                                                                                                             |
| 10. | <b>Density</b>    | *L-function max gradient: The max value of the gradient of the above L-function.                                                                                                                                                                                                   |
| 11. | <b>Density</b>    | *L-function min gradient: The min value of the gradient of the above L-function.                                                                                                                                                                                                   |
| 12. | <b>Density</b>    | *L monotony: The correlation of the L-function and $r=[1,d]$ .                                                                                                                                                                                                                     |
| 13. | <b>Density</b>    | *L-function at $d/2$ : The value of the L-function evaluated at $\frac{1}{4}$ of the maximum cell diameter.                                                                                                                                                                        |

\*The L-function measures spatial clustering of a point pattern over an area of interest.
